# Supplementary material for: Antitumor Activity of PEGylated and TEGylated Phenothiazine Derivatives: Structure–Activity Relationship
Source: MDPI journal article supplement (doi:10.3390/ijms24065449), 2023-03-13
Supplement: s1 [file s1]

## **Supporting Information**

for

# **Antitumor Activity of PEGylated and TEGylated Phenothiazine**

## **Derivatives: Structure–Activity Relationship**

Sandu Cibotaru, Andreea-Isabela Sandu, Alina Nicolescu and Luminita Marin \*

“Petru Poni” Institute of Macromolecular Chemistry, 700487 Iasi, Romania

\* Correspondence: lmarin@icmpp.ro

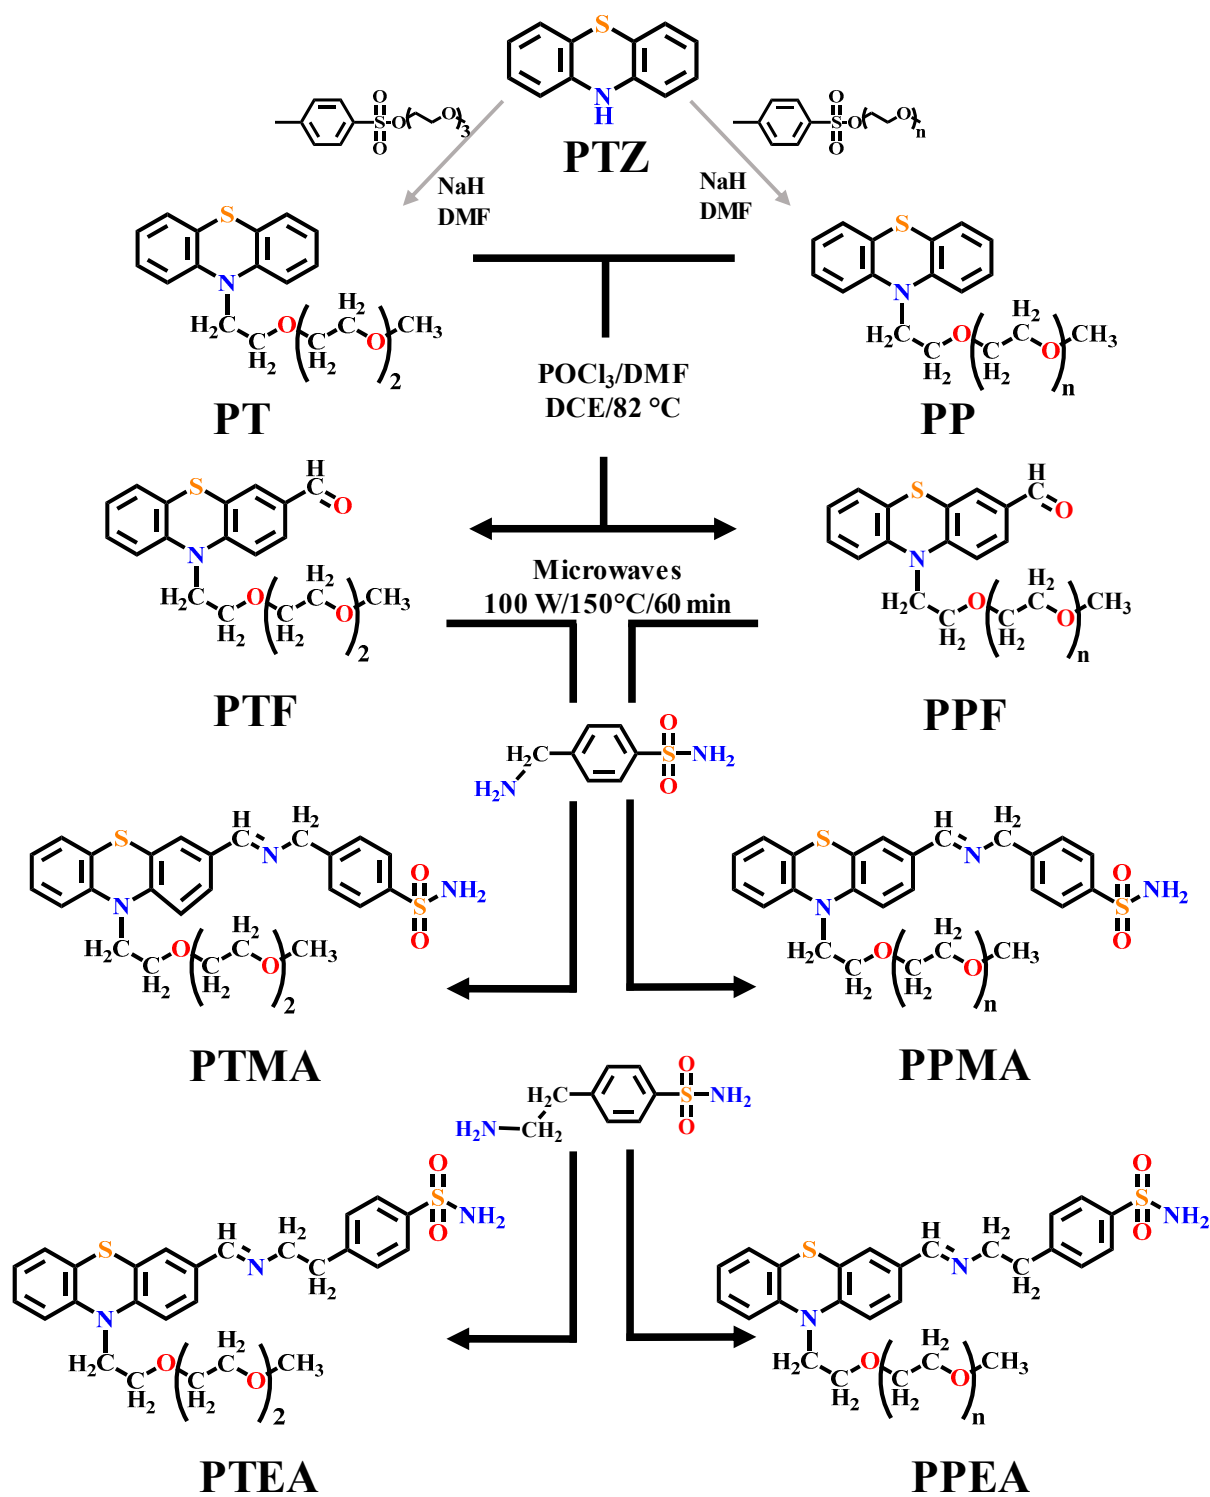

**Scheme S1.** The synthesis pathway of the studied compounds

**Table S1.** Half maximal inhibition concentration (IC<sub>50</sub>) of TEGylated and PEGylated derivatives on different tumor lines and a normal cell line. Cells were treated with various concentrations of PEGylated phenothiazines for 48 h. Cells viability was determined by MTS assay to obtain IC<sub>50</sub> values. The yellow marked values presented a higher concentration than the last used for experiment.

| <b>Code<br/>Cell Line</b> | <b>PTZ</b> | <b>PPF</b> | <b>PTF</b> | <b>PTMA</b> | <b>PTEA</b> | <b>PPMA</b> | <b>PPEA</b> |
|---------------------------|------------|------------|------------|-------------|-------------|-------------|-------------|
| <b>NHDF</b>               | 0.175      | >0.300     | 0.150      | 0.200       | 0.107       | 0.150       | 0.108       |
| <b>CT-26</b>              | 0.186      | 0.139      | 0.063      | 0.107       | 0.080       | 0.040       | 0.029       |
| <b>HeLa</b>               | 0.240      | >0.300     | 0.015      | 0.029       | 0.015       | 0.116       | 0.086       |
| <b>HepG2</b>              | 0.073      | 0.106      | 0.050      | 0.083       | 0.085       | 0.054       | 0.040       |
| <b>HOS</b>                | >0.300     | >0.300     | >0.300     | >0.300      | >0.300      | >0.300      | >0.300      |
| <b>LN229</b>              | >0.300     | >0.300     | 0.186      | 0.219       | 0.183       | 0.239       | 0.109       |
| <b>MCF-7</b>              | 0.188      | 0.270      | 0.108      | 0.141       | 0.138       | 0.090       | 0.090       |
| <b>MeWo</b>               | >0.300     | 0.235      | 0.147      | 0.287       | 0.239       | 0.104       | 0.068       |
| <b>U-118</b>              | >0.300     | >0.300     | 0.190      | >0.300      | 0.170       | 0.092       | 0.100       |

**Table S2.** Selectivity index of TEGylated and PEGylated derivatives on tested tumor cell lines

| <b>Selectivity index (SI)</b> |            |            |            |             |             |             |             |
|-------------------------------|------------|------------|------------|-------------|-------------|-------------|-------------|
|                               | <b>PTZ</b> | <b>PTF</b> | <b>PPF</b> | <b>PTMA</b> | <b>PTEA</b> | <b>PPMA</b> | <b>PPEA</b> |
| <b>CT-26</b>                  | -          | 2.38       | -          | 2           | 1.25        | 3.75        | 3.44        |
| <b>HeLa</b>                   | -          | 10         | -          | 6.89        | 6.66        | 1.36        | 1.25        |
| <b>HepG2</b>                  | 2.42       | 3          | -          | 2.5         | 1.25        | 3           | 2.5         |
| <b>HOS</b>                    | -          | -          | -          | -           | -           | -           | -           |
| <b>LN229</b>                  | -          | -          | -          | -           | -           | -           | -           |
| <b>MCF7</b>                   | -          | 1.5        | -          | 1.42        | -           | 1.66        | 1.11        |
| <b>MeWo</b>                   | -          | -          | -          | -           | -           | 1.5         | 1.66        |
| <b>U118MG</b>                 | -          | -          | -          | -           | -           | 1.66        | -           |

**Table S3.** IC<sub>50</sub> values for different tumor cell lines, of two therapeutic antitumor drugs

| <b>Drug</b>    | <b>Cell Line</b> | <b>IC<sub>50</sub> (μM)</b> | <b>Reference</b> |
|----------------|------------------|-----------------------------|------------------|
| Doxorubicin    | HepG2            | 1.03                        | [74]             |
|                | HeLa             | 0.18                        | [75]             |
|                | MCF-7            | 0.07                        |                  |
|                | CT-26            | 10                          | [76]             |
|                | MeWo             | 88                          | [77]             |
|                | NHDF             | 0.137                       | [78]             |
| 5-Fluorouracil | HepG2            | 253                         | [79]             |
|                | HeLa             | 676.9                       |                  |
|                | MCF-7            | 12.7                        | [80]             |
|                | CT-26            | 300                         | [81]             |
|                | MeWo             | 61.5                        | [82]             |
|                | NHDF             | 25                          | [78]             |

**Table S4.** Half maximal inhibition concentration (IC<sub>50</sub>) of other phenothiazine-based compounds determined on different tumor lines

| Drug                                                                                             | Cell Line | IC <sub>50</sub><br>( $\mu$ M) | Reference |
|--------------------------------------------------------------------------------------------------|-----------|--------------------------------|-----------|
| 10- {[1-(4-Chlorophenyl)-1H-1,2,3-triazol-4-yl]methyl}-<br>2-{trifluoromethyl}-10H-phenothiazine | MCF-7     | 29.6                           | [80]      |
| 10- {[1-(3,4,5-Trimethoxybenzyl)-1H-1,2,3-triazol-4-yl]methyl}-10H-phenothiazine                 |           | 0.8                            |           |
| 3-([1,2,4]Triazolo[4,3-a]pyridin-3-yl)-10-ethyl-7-(4-methoxyphenyl)-10H-phenothiazine            |           | 57.2                           | [25]      |
| 3-([1,2,4]Triazolo[4,3-a]pyridin-3-yl)-10-ethyl-7-phenyl-10H-phenothiazine                       |           | 10.2                           |           |
| Trifluoperazine                                                                                  |           | 11.3                           | [83]      |
| Thioridazine                                                                                     |           | 12.9                           |           |
| 1-[(10H-Phenothiazin-3-yl)carbonyl]-3-acetyl-7-methylindolizine                                  |           | >10                            | [84]      |
| 1-[(10H-Phenothiazin-3-yl)carbonyl]-3-acetyl-6,8-dimethylindolizine                              |           | >10                            |           |
| 1-[(10H-Phenothiazin-3-yl)carbonyl]-3-acetyl-7-methoxyindolizine                                 |           | >10                            |           |
| Thioridazine                                                                                     | U87-MG    | 12.4                           | [85]      |
| Prochlorperazine                                                                                 |           | 0.97                           | [86]      |
| Perphenazine                                                                                     |           | 6.8                            |           |
| Fluphenazine                                                                                     | CBM8401   | 10.0                           | [87]      |
| thioridazine                                                                                     | HepG2     | 45.5                           |           |
| 10-((1-(4-Chlorophenyl)-1H-1,2,3-triazol-4-yl)methyl)-10Hphenothiazine                           |           | 1.3                            |           |
| 10-((1-(4-Methoxyphenyl)-1H-1,2,3-triazol-4-yl)methyl)-10Hphenothiazine (7f)                     |           | 15.0                           | [88]      |
| 1-Phenethylamino-3-(10H-phenothiazin-10-yl)-2-propanol                                           | HeLa      | 10.0                           |           |
| N-alkyl-3-formylphenothiazine                                                                    |           | 57.69                          | [90]      |
| Chlorpromazine                                                                                   | Colo205   | 10.0                           | [91]      |
| Fluphenazine                                                                                     |           | 7.18                           | [92]      |

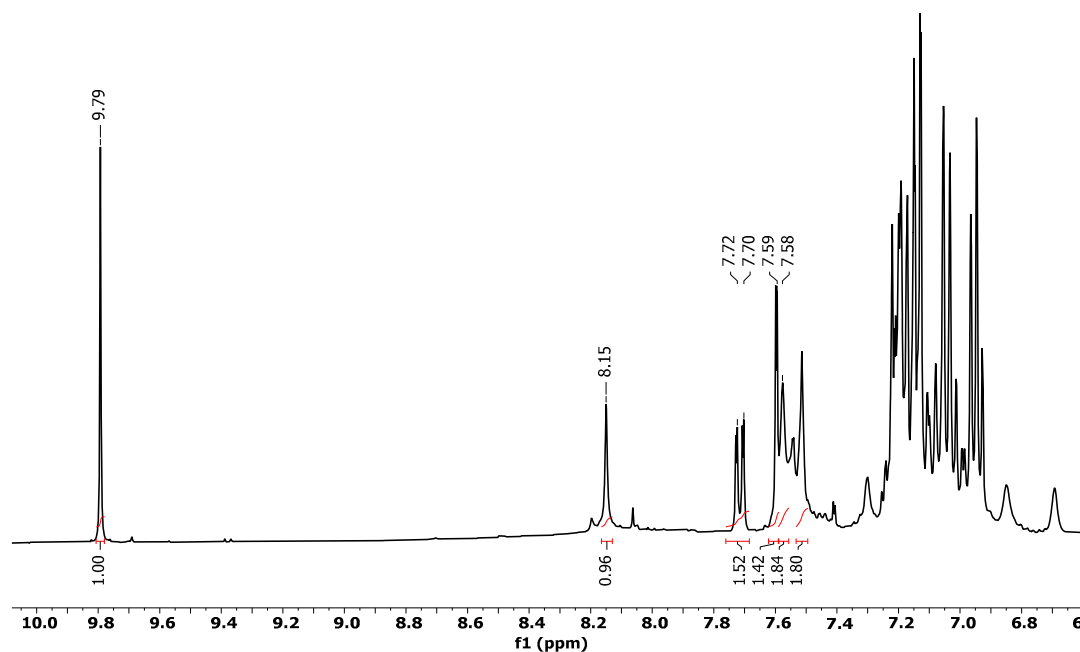

**Figure S1.** The  $^1\text{H}$ -NMR spectrum for the PTF-glutamine mixture, recorded in  $\text{DMSO-d}_6$ , at 600 MHz.

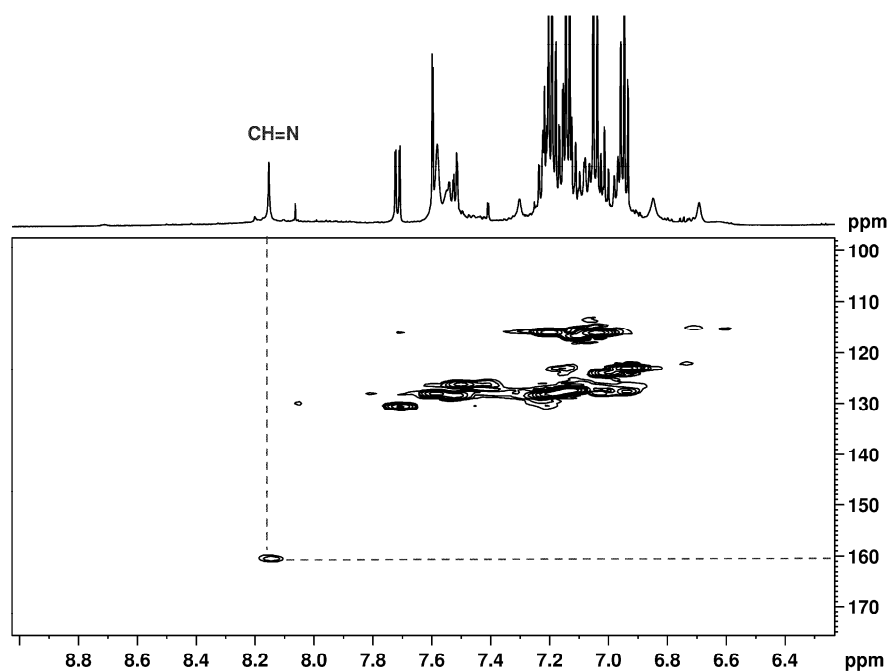

**Figure S2.** The  $^1\text{H}$ ,  $^{13}\text{C}$ -HSQC NMR spectrum for the PTF-glutamine mixture, showing the direct bond correlation signal between proton from 8.15 ppm and carbon from 160.5 ppm, as prove for amine group formation.

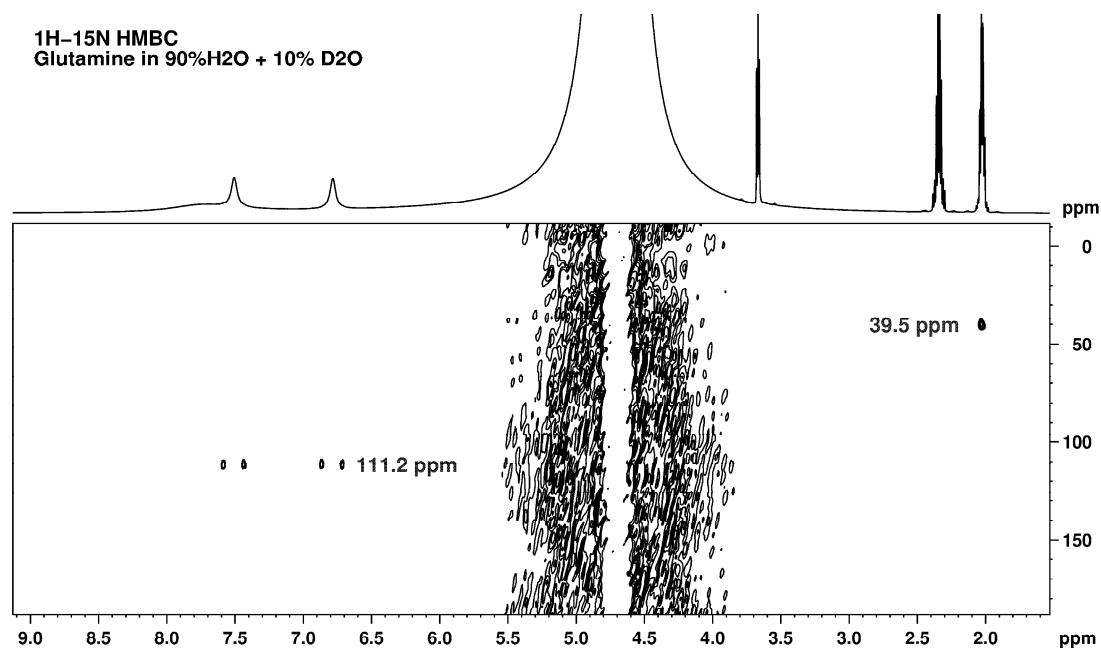

**Figure S3.** The  $^1\text{H}$ , $^{15}\text{N}$ -HMBC NMR spectrum for glutamine, recorded in 9/1  $\text{H}_2\text{O}/\text{D}_2\text{O}$  mixture, showing proton-nitrogen correlation signals at 39.5 ppm (primary amine group) and 111.2 ppm (amide group).

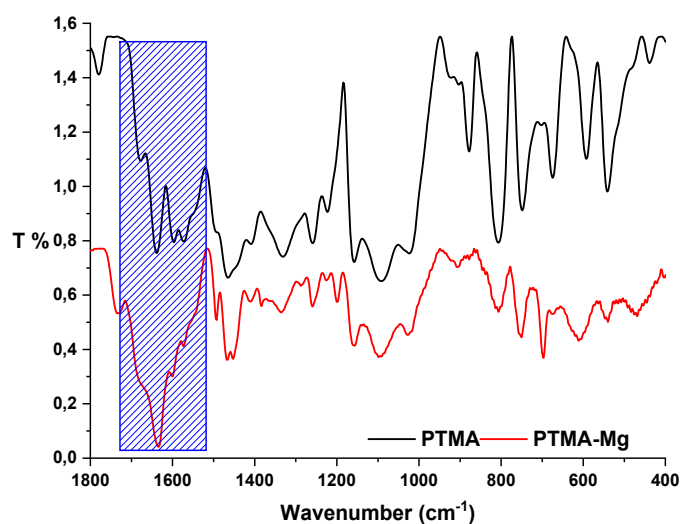

**Figure S4.** FTIR spectra of the PTMA incubated with magnesium salts compared to pristine derivatives

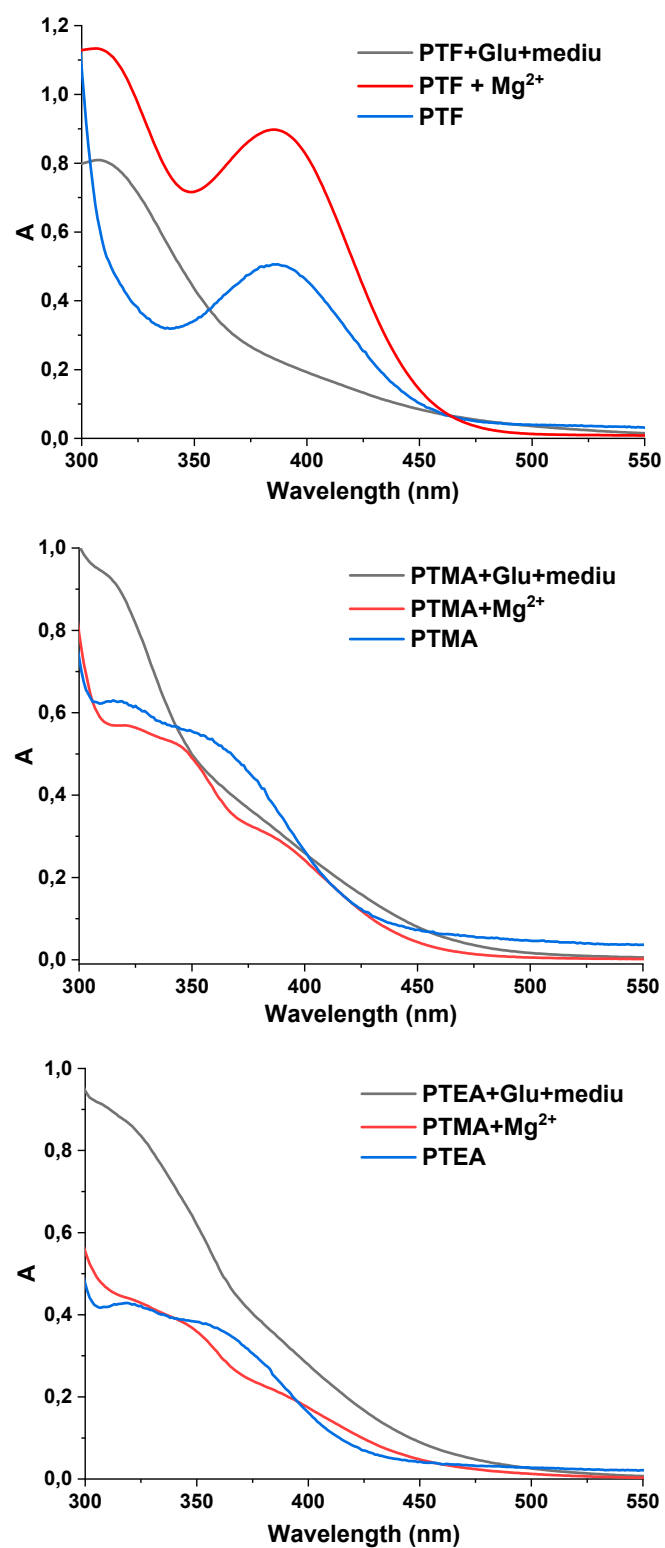

**Figure S5.** The comparative UV-vis spectra of the TEGylated derivatives with their mixture with glutamine and with Mg<sup>2+</sup>: a) PTF, b) PTMA, c) PTEA



## Funding

This research was funded by a grant from the Romanian Ministry of Education and Research, CNCS - UEFISCDI, project number PCE2/2021 within PNCDI III.

## References

- Dubbelboer, I.R.; Pavlovic, N.; Heindryckx, F.; Sjögren, E.; Lennernäs, H. Liver Cancer Cell Lines Treated with Doxorubicin under Normoxia and Hypoxia: Cell Viability and Oncologic Protein Profile. *Cancers (Basel)* **2019**, *11*, 1024, doi:10.3390/cancers11071024.
- Khan, F.M.; Saleh, E.; Alawadhi, H.; Harati, R.; Zimmermann, W.-H.; El-Awady, R. Inhibition of Exosome Release by Ketotifen Enhances Sensitivity of Cancer Cells to Doxorubicin. *Cancer Biol Ther* **2018**, *19*, 25–33, doi:10.1080/15384047.2017.1394544.
- Jeong, Y.-I.; Park, H.-K.; Lee, S.J.; Oh, J.-S.; Lee, S.-G.; Lee, H.C.; Hwan Kang, D. Enzyme-Responsive Doxorubicin Release from Dendrimer Nanoparticles for Anticancer Drug Delivery. *Int J Nanomedicine* **2015**, 5489, doi:10.2147/IJN.S87145.
- Durand, N.; Simsir, M.; Signetti, L.; Labbal, F.; Ballotti, R.; Mus-Veteau, I. Methiothepin Increases Chemotherapy Efficacy against Resistant Melanoma Cells. *Molecules* **2021**, *26*, 1867, doi:10.3390/molecules26071867.
- Zych, D.; Slodek, A.; Krompiec, S.; Malarz, K.; Mrozek-Wilczkiewicz, A.; Musiol, R. 4'-Phenyl-2,2':6',2''-Terpyridine Derivatives Containing 1-Substituted-2,3-Triazole Ring: Synthesis, Characterization and Anticancer Activity. *ChemistrySelect* **2018**, *3*, 7009–7017, doi:10.1002/slct.201801204.
- Yuan, F.; Qin, X.; Zhou, D.; Xiang, Q.-Y.; Wang, M.-T.; Zhang, Z.-R.; Huang, Y. In Vitro Cytotoxicity, in Vivo Biodistribution and Antitumor Activity of HPMa Copolymer-5-Fluorouracil Conjugates. *European Journal of Pharmaceutics and Biopharmaceutics* **2008**, *70*, 770–776, doi:10.1016/j.ejpb.2008.06.028.
- Zhang, J.-X.; Guo, J.-M.; Zhang, T.-T.; Lin, H.-J.; Qi, N.-S.; Li, Z.-G.; Zhou, J.-C.; Zhang, Z.-Z. Antiproliferative Phenothiazine Hybrids as Novel Apoptosis Inducers against MCF-7 Breast Cancer. *Molecules* **2018**, *23*, 1288, doi:10.3390/molecules23061288.
- Pangeni, R.; Choi, S.W.; Jeon, O.-C.; Byun, Y.; Park, J.W. Multiple Nanoemulsion System for an Oral Combinational Delivery of Oxaliplatin and 5-Fluorouracil: Preparation and in Vivo Evaluation. *Int J Nanomedicine* **2016**, *Volume 11*, 6379–6399, doi:10.2147/IJN.S121114.
- Freitas, L.B.O.; Boaventura, M.A.D.; Santos, W.L.; Stehmann, J.R.; Junior, D.D.; Lopes, M.T.P.; Magalhães, T.F.F.; da Silva, D.L.; de Resende, M.A. Allelopathic, Cytotoxic and Antifungal Activities of New Dihydrophenanthrenes and Other Constituents of Leaves and Roots Extracts of *Banisteriopsis Anisandra* (Malpighiaceae). *Phytochem Lett* **2015**, *12*, 9–16, doi:10.1016/j.phytol.2015.02.006.
- Sachdeva, T.; Low, M.L.; Mai, C.; Cheong, S.L.; Liew, Y.K.; Milton, M.D. Design, Synthesis and Characterisation of Novel Phenothiazine-Based Triazolopyridine Derivatives: Evaluation of Anti-Breast Cancer Activity on Human Breast Carcinoma. *ChemistrySelect* **2019**, *4*, 12701–12707, doi:10.1002/slct.201903203.

- Gao, Y.; Sun, T.-Y.; Bai, W.-F.; Bai, C.-G. Design, Synthesis and Evaluation of Novel Phenothiazine Derivatives as Inhibitors of Breast Cancer Stem Cells. *Eur J Med Chem* **2019**, *183*, 111692, doi:10.1016/j.ejmech.2019.111692.
- Moise, I.-M.; Bîcu, E.; Farce, A.; Dubois, J.; Ghinet, A. Indolizine-Phenothiazine Hybrids as the First Dual Inhibitors of Tubulin Polymerization and Farnesyltransferase with Synergistic Antitumor Activity. *Bioorg Chem* **2020**, *103*, 104184, doi:10.1016/j.bioorg.2020.104184.
- Chu, C.-W.; Ko, H.-J.; Chou, C.-H.; Cheng, T.-S.; Cheng, H.-W.; Liang, Y.-H.; Lai, Y.-L.; Lin, C.-Y.; Wang, C.; Loh, J.-K.; et al. Thioridazine Enhances P62-Mediated Autophagy and Apoptosis Through Wnt/ $\beta$ -Catenin Signaling Pathway in Glioma Cells. *Int J Mol Sci* **2019**, *20*, 473, doi:10.3390/ijms20030473.
- Xu, F.; Xia, Y.; Feng, Z.; Lin, W.; Xue, Q.; Jiang, J.; Yu, X.; Peng, C.; Luo, M.; Yang, Y.; et al. Repositioning Antipsychotic Fluphenazine Hydrochloride for Treating Triple Negative Breast Cancer with Brain Metastases and Lung Metastases. *Am J Cancer Res* **2019**, *9*, 459–478.
- de Faria, P.A.; Bettanin, F.; Cunha, R.L.O.R.; Paredes-Gamero, E.J.; Homem-de-Mello, P.; Nantes, I.L.; Rodrigues, T. Cytotoxicity of Phenothiazine Derivatives Associated with Mitochondrial Dysfunction: A Structure-Activity Investigation. *Toxicology* **2015**, *330*, 44–54, doi:10.1016/j.tox.2015.02.004.
- Ma, X.-H.; Liu, N.; Lu, J.-L.; Zhao, J.; Zhang, X.-J. Design, Synthesis and Antiproliferative Activity of Novel Phenothiazine-1,2,3-Triazole Analogues. *J Chem Res* **2017**, *41*, 696–698, doi:10.3184/174751917X15122516000140.
- Okumura, H.; Nakazawa, J.; Tsuganezawa, K.; Usui, T.; Osada, H.; Matsumoto, T.; Tanaka, A.; Yokoyama, S. Phenothiazine and Carbazole-Related Compounds Inhibit Mitotic Kinesin Eg5 and Trigger Apoptosis in Transformed Culture Cells. *Toxicol Lett* **2006**, *166*, 44–52, doi:10.1016/j.toxlet.2006.05.011.
- Venkatesan, K.; Satyanarayana, V.S. v.; Sivakumar, A. Synthesis and Biological Evaluation of Novel Phenothiazine Derivatives as Potential Antitumor Agents. *Polycycl Aromat Compd* **2023**, *43*, 850–859, doi:10.1080/10406638.2021.2021254.
- Gutierrez, A.; Pan, L.; Groen, R.W.J.; Baleyrier, F.; Kentsis, A.; Marineau, J.; Grebliunaite, R.; Kozakewich, E.; Reed, C.; Pflumio, F.; et al. Phenothiazines Induce PP2A-Mediated Apoptosis in T Cell Acute Lymphoblastic Leukemia. *Journal of Clinical Investigation* **2014**, *124*, 644–655, doi:10.1172/JCI65093.
- Choi, J.H.; Yang, Y.R.; Lee, S.K.; Kim, S.-H.; Kim, Y.-H.; Cha, J.-Y.; Oh, S.-W.; Ha, J.-R.; Ryu, S.H.; Suh, P.-G. Potential Inhibition of PDK1/Akt Signaling by Phenothiazines Suppresses Cancer Cell Proliferation and Survival. *Ann N Y Acad Sci* **2008**, *1138*, 393–403, doi:10.1196/annals.1414.041.
